# Supplementary material for: Identification of new developmentally regulated genes involved in Streptomyces coelicolor sporulation
Source: PubMed Central journal article supplement (PMC3878966; doi:10.1186/1471-2180-13-281), 2013-12-05

## Supplementary Figures

### Figure S1.

Previously known sporulation-related genes that were significantly affected (Benjamini-Hochberg corrected  $p$ -value  $<0.05$ ) by *whiA* or *whiH* mutations compared to wild-type during at least one developmental time point. Expression values displayed as shown in Fig. 2. Genes *SCO1415* and *SCO1416* are *smeA* and *sffA*, respectively.

### Figure S2.

Verification of microarray-derived expression patterns using real-time qRT-PCR for 17 selected genes that according to the array data are up-regulated during sporulation in a *whiA*-dependent way. The microarray data are plotted as relative expression values, which are the  $\log_2$  values of the ratios between signals from two different time points or strains (A). In order to facilitate direct comparison of results, the data from qRT-PCR have been re-calculated to obtain the ratio of transcript abundances from the two time-points or strains to be compared, and the  $\log_2$  of these relative transcript abundances from qRT-PCR assays (B) are directly comparable to the relative expression values from the microarray analyses. Statistically significant differences are indicated by a star ( $p$ -value  $<0.05$ ). For the qRT-PCR results, the statistical significance of the difference in each comparison was estimated by a t test. Data for the constitutively expressed *hrdB* is shown as a control for the qRT-PCR data.

### Figure S3.

Verification of microarray-derived expression patterns using real-time qRT-PCR for six selected genes that according to the array data are up-regulated in a *whiH* mutant. The microarray data are plotted as relative expression values, which are the  $\log_2$  values of the ratios between signals from two different time points or strains (A). In order to facilitate direct comparison of results, the data from qRT-PCR have been recalculated to obtain the ratio of transcript abundances from the two time-points or strains to be compared, and the  $\log_2$  of these relative transcript abundances from qRT-PCR assays (B) are directly comparable to the relative expression values from the microarray analyses. Statistically significant differences are indicated by a star (*p*-value <0.05). For the qRT-PCR results, the statistical significance of the difference in each comparison was estimated by a t test. Data for the constitutively expressed *hrdB* is shown as a control for the qRT-PCR data..

**Figure S4.**

Low-resolution S1 nuclease protection assays of *eshA* (*SCO7699*) and *eshB* (*SCO5249*) transcripts during development of *S. coelicolor* wild-type stain M145 and *whiH* mutant J2408. According to the array data, both of these genes had significantly higher expression in the *whiH* mutant compared to the wildtype parent. However, the S1 assays show that both genes are similarly up-regulated in both the wild-type and the *whiH* mutant and show no clear dependence on *whiH*.

**Figure S5.**

RT-PCR detection of transcripts spanning specific regions in the *SCO1775-1773* region of the *S. coelicolor* chromosome. Specific primer pairs were used to detect templates spanning specific regions (Fig. 4 and Table S1). cDNA was synthesised

from RNA that had been prepared from *S. coelicolor* strain M145 at two different developmental time points; 18 h corresponding to mainly vegetative mycelium, and 48 h when the culture also contained abundant aerial mycelium and spores. Control samples that had not been treated with reverse transcriptase were used as controls to confirm that observed signals were not from contaminating DNA. Another control used genomic DNA as template. The results are summarized in Fig. 4.



Fig. S2

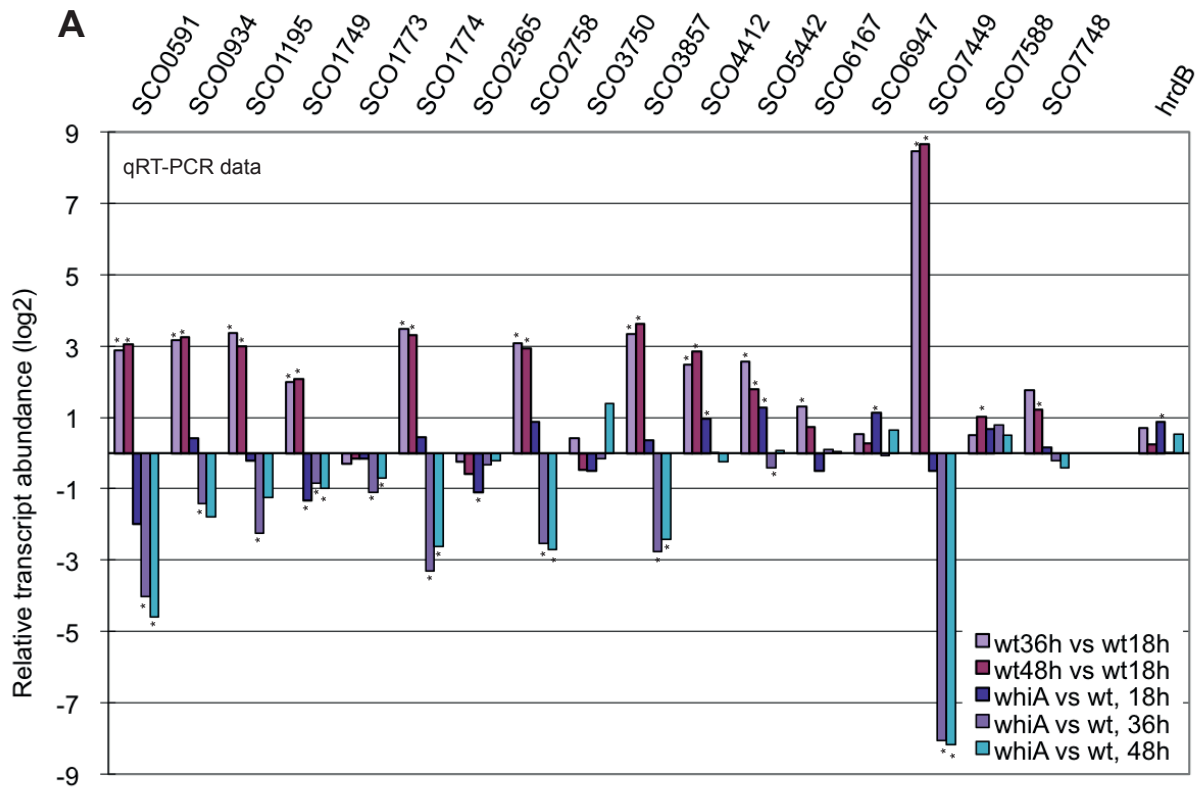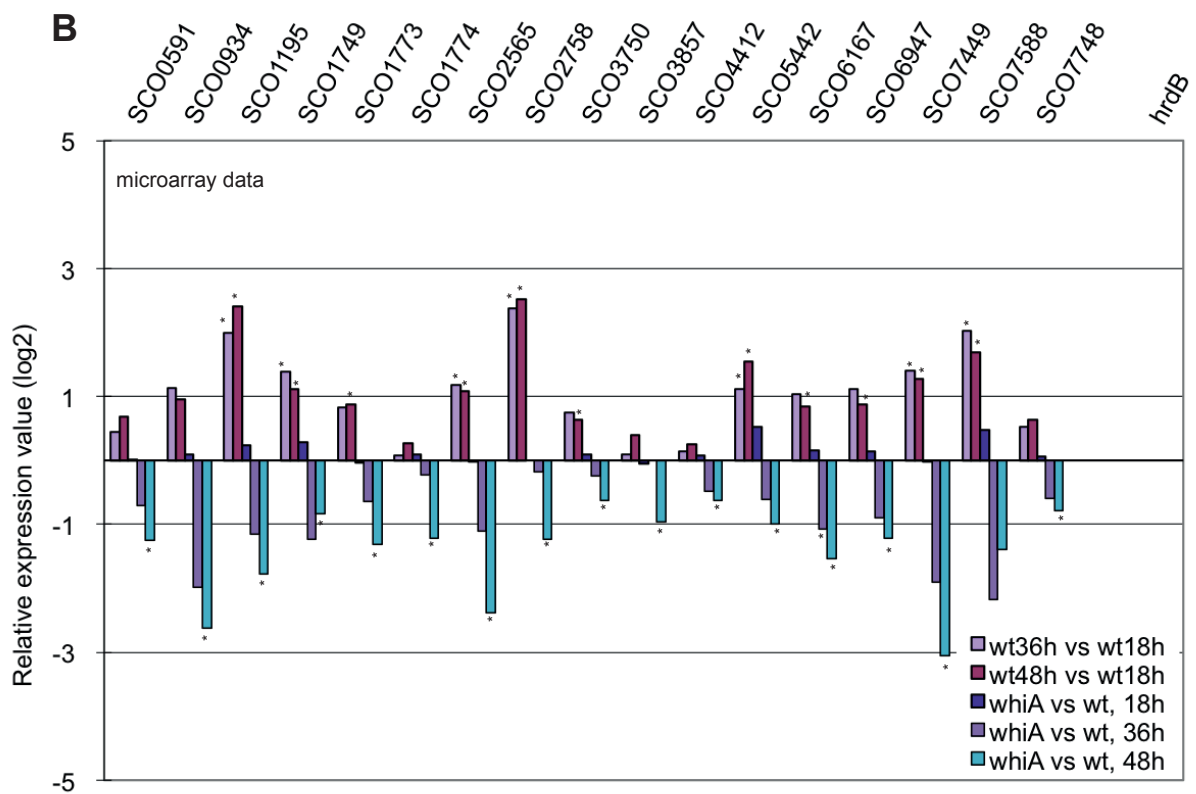

Fig. S3

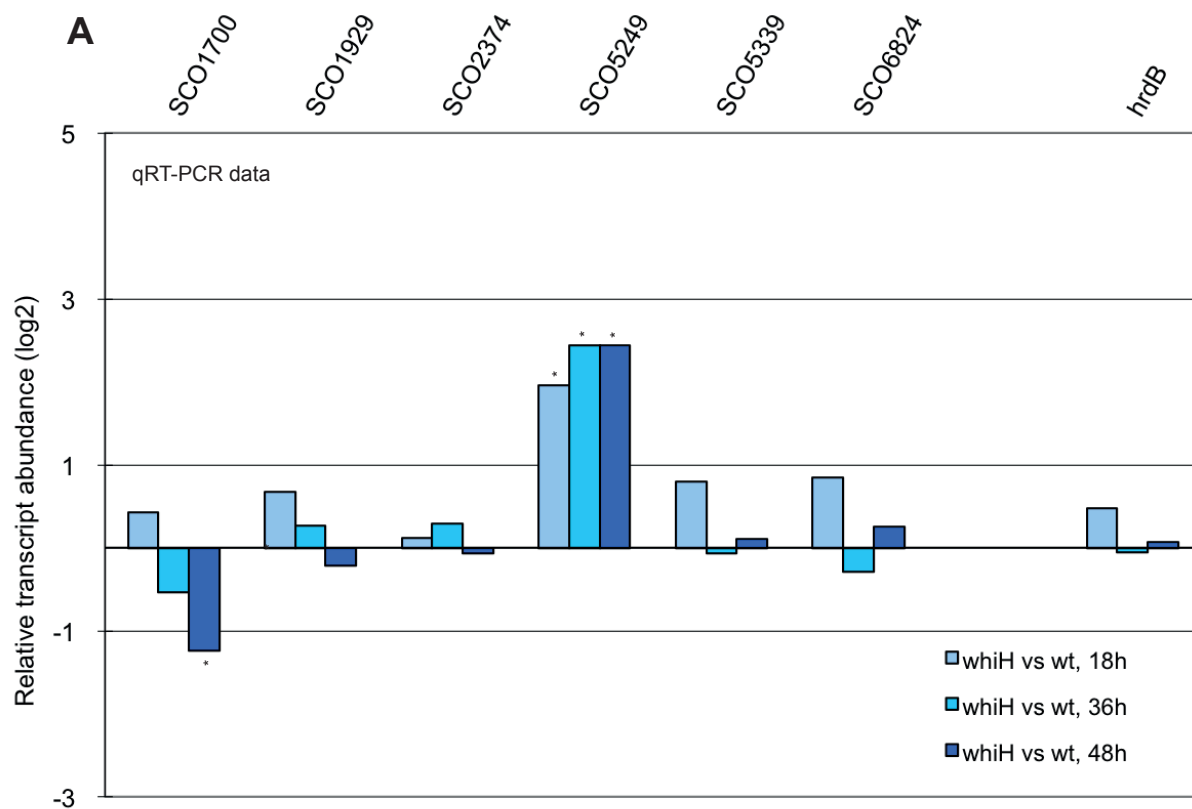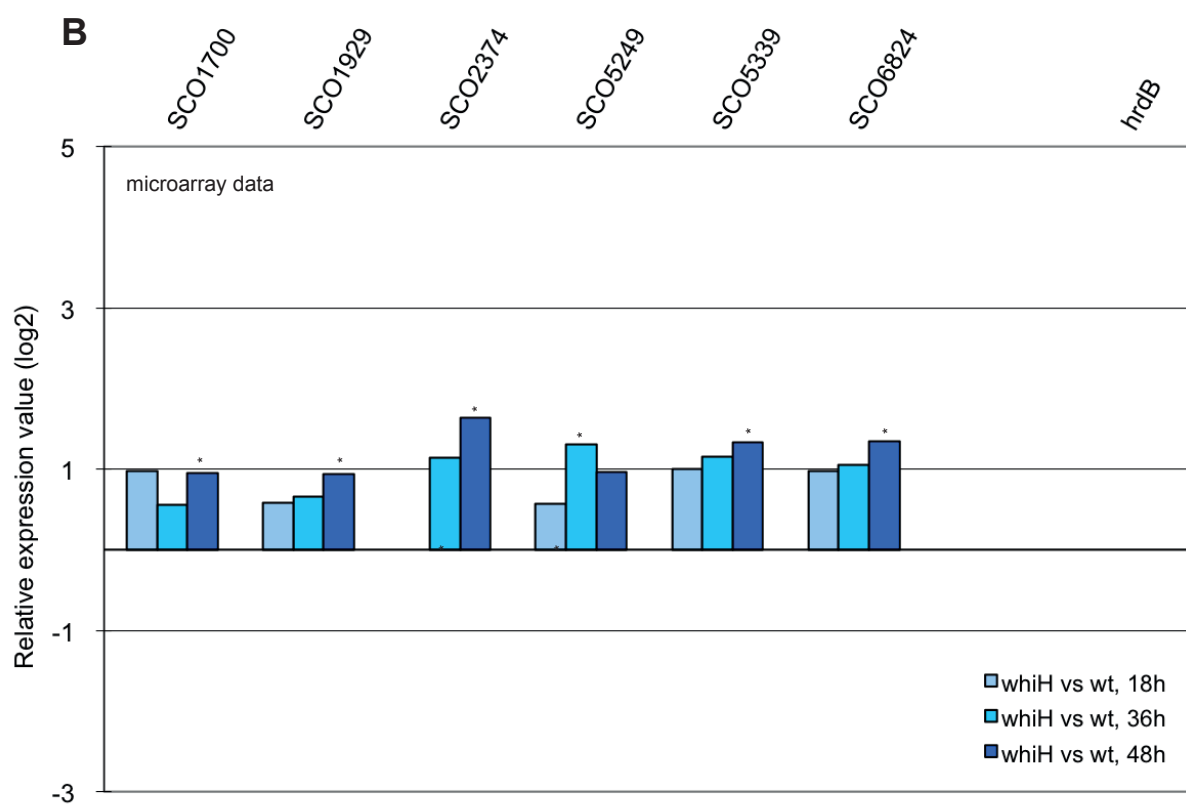

Fig. S4

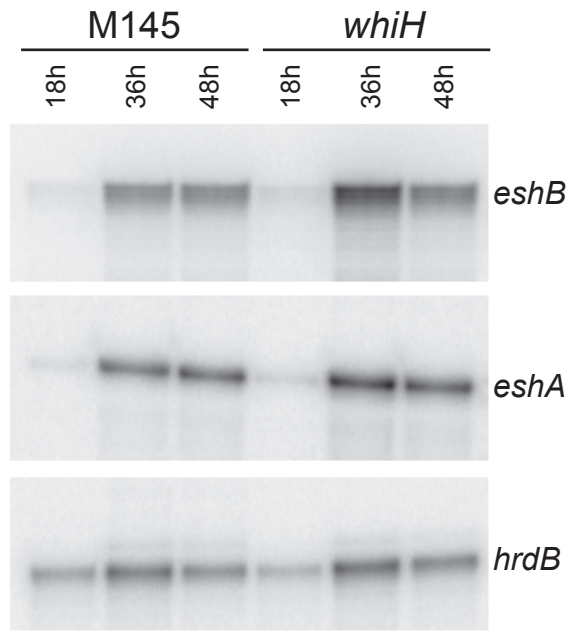

Supplement: 1471-2180-13-281-S2.pdf [file 1471-2180-13-281-S2.pdf]
