# Supplementary material for: Identification of new developmentally regulated genes involved in Streptomyces coelicolor sporulation
Source: PubMed Central journal article supplement (PMC3878966; doi:10.1186/1471-2180-13-281), 2013-12-05
Supplement: 1471-2180-13-281-S3.pdf [file 1471-2180-13-281-S3.pdf]

**Table S2.** *Oligonucleotide primers used in this study*

| Primer                                        | Sequence <sup>1</sup> | Comment |
|-----------------------------------------------|-----------------------|---------|
| <b>Primers for real-time qRT-PCR analyses</b> |                       |         |
| SCO0591 RTfor                                 | ctcctaccggaaccgtact   |         |
| SCO0591 RTrev                                 | gccgtgatcgacgaagtagt  |         |
| SCO0934 RTfor                                 | gcaactgagggtctttctgg  |         |
| SCO0934 RTrev                                 | gatgttgcctggctggtt    |         |
| SCO0934 II-RTfor                              | ctcaccaggacggaccatt   |         |
| SCO0934 II-RTrev                              | agtgttgcgcatgtgatcct  |         |
| SCO1195 RTfor                                 | tctgtggtgctcttgcctgc  |         |
| SCO1195 RTrev                                 | gtcagtcgctgttgatggt   |         |
| SCO1700 RTfor                                 | catcgcatctaccagctc    |         |
| SCO1700 RTrev                                 | ctgactatctggccgacctc  |         |
| SCO1749 RTfor                                 | acgacaacaacgatgacgag  |         |
| SCO1749 RTrev                                 | ggaacagctcaccgatgg    |         |
| SCO1773 RTfor                                 | ggtccacaactcggctctct  |         |
| SCO1773 RTrev                                 | gtaaacgacctgcccgtcat  |         |
| SCO1774 RTfor                                 | gtgtcttcggcctcgtctac  |         |
| SCO1774 RTrev                                 | aagtcgtccagggtggtg    |         |
| SCO1929 RTfor                                 | gtgctcgagacgaagatgct  |         |
| SCO1929 RTrev                                 | tatgatgtccacggagctga  |         |
| SCO2374 RTfor                                 | ctgcggaactcaagaaac    |         |
| SCO2374 RTrev                                 | cgaagtaccggaagaaggtg  |         |
| SCO2565 RTfor                                 | cagtggtcgtcctcctg     |         |
| SCO2565 RTrev                                 | gaacgcgtccagttcacc    |         |
| SCO2758 RTfor                                 | gacgctggaggagaaggtc   |         |
| SCO2758 RTrev                                 | cccaggcgaagtagatgatg  |         |
| SCO3750 RTfor                                 | acggcgtacttctgtggtg   |         |
| SCO3750 RTrev                                 | gtcgtctcgcaccagcag    |         |
| SCO3750 II RTfor                              | cacctgggtttcctgct     |         |
| SCO3750 II RTrev                              | gatccgatggacgtggt     |         |
| SCO3857 RTfor                                 | aaggagatccagaggctga   |         |
| SCO3857 RTrev                                 | ctgcttgtcccaccacttc   |         |
| SCO4412 RTfor                                 | gttctgctcgtctccgaact  |         |
| SCO4412 RTrev                                 | tcctgagtctcctcggctac  |         |
| SCO4412 II RTfor                              | ttcaagtgcagctggaggtc  |         |
| SCO4412 II RTrev                              | agttcggagacgagcagaac  |         |
| SCO5249 RTfor                                 | ctgtacaaccagccgatgaa  |         |
| SCO5249 RTrev                                 | aactcccgggtgtgatgag   |         |
| SCO5339 RTfor                                 | gtctatcagcgcaacctcgt  |         |
| SCO5339 RTrev                                 | agctgtagacgtcctgcat   |         |
| SCO5442 RTfor                                 | gtgccgtaccttaccagga   |         |
| SCO5442 RTrev                                 | gcgtagtcgccgaagtagtc  |         |
| SCO6167 RTfor                                 | ggacgaggcgaagaagacc   |         |
| SCO6167 RTrev                                 | gtcgtcgacctcagaccag   |         |
| SCO6824 RTfor                                 | cctcatcaatccgctcactt  |         |
| SCO6824 RTrev                                 | gtcagaagcccgtgagtc    |         |
| SCO6947 RTfor                                 | cctactcgtggtggtagc    |         |
| SCO6947 RTrev                                 | gcgcggagtagtagaccgta  |         |
| SCO7449 RTfor                                 | agacctaccagcaggacgag  |         |
| SCO7449 RTrev                                 | actccgtgagccgacttct   |         |
| SCO7588 RTfor                                 | gaactgacctctccctgtc   |         |
| SCO7588 RTrev                                 | gatgagggccggtacgaa    |         |
| SCO7748 RTfor                                 | gagaacagggtggacctcaa  |         |
| SCO7748 RTrev                                 | gacggtggtggaagagatgt  |         |
| hrdB RTfor                                    | tggtcgaggtcatcaacaag  |         |
| hrdB RTrev                                    | tggacctcgatgacctctc   |         |

### Primers for making probes for S1 nuclease mapping

|       |                          |             |
|-------|--------------------------|-------------|
| KF240 | gtgccttgaggaaactgctc     | <i>eshB</i> |
| KF241 | ctgcatctgaggaacggact     | <i>eshB</i> |
| KF242 | agcccgatctcgtcatagtg     | <i>eshA</i> |
| KF243 | ggaggtgatctcctgcatct     | <i>eshA</i> |
| KF256 | ggttcgacgacatcaaggag     | SCO4157     |
| KF257 | ggttccctgtacgggttc       | SCO4157     |
| KF260 | gagagctgcacaacaactgc     | SCO1774     |
| KF261 | agggtcctgggacagtctga     | SCO1774     |
| HRDB1 | gccatgacagagacggactcggcg | <i>hrdB</i> |
| HRDB2 | cggccgcaaggtagtgatga     | <i>hrbD</i> |

### Primers for RT-PCR analysis of SCO1773-1774

|               |                      |
|---------------|----------------------|
| 4-3for        | ggccgaacggatgttgag   |
| 4-3rev        | ccgtgacgtactcctcgtc  |
| SCO1773 RTfor | ggtccacaactcggcttct  |
| SCO1773 RTrev | gtaaacgacctgcccgtcat |
| SCO1774 RTfor | gtgtcttcggcctcgtctac |
| SCO1774 RTrev | aagtcgtccagggtggtg   |

### Primers for construction of deletion mutants by $\lambda$ Red-mediated recombineering

|       |                                                                                   |                                    |
|-------|-----------------------------------------------------------------------------------|------------------------------------|
| KF284 | cttctcaggcagcactcaggccgtctcatccgcccggcggaagctcatg<br><u>attccgggatccgtcgacc</u>   | SCO4157                            |
| KF285 | gtcaacgcctcagcgtcgacgtcttcgcgcccgctcagttgctcgta<br><u>tgtaggctggagctgcttc</u>     | SCO4157                            |
| KF286 | aggctctcaaacgccgaaccgggctccggcgggcaccggcgtgcggtg<br><u>attccgggatccgtcgacc</u>    | SCO1774-1773                       |
| KF287 | tggcgtgacgggtgtctgttgacgtatcgctttaccgtgacgactta<br><u>tgtaggctggagctgcttc</u>     | SCO1774-1773                       |
| KF288 | gtatgccttgaatagcccactctctgagccaaggacctgatccacgtg<br><u>attccgggatccgtcgacc</u>    | SCO1773 (used together with KF287) |
| KF289 | aagggtggaagtcgaattaccgtacgccaccgaggagggaacccgtg<br><u>attccgggatccgtcgacc</u>     | SCO3857                            |
| KF290 | gtaacgaaacgacagaaggcggccggcgccagtagcggcgagcggggatca<br><u>tgtaggctggagctgcttc</u> | SCO3857                            |
| KF426 | gctgacgaagcaccagctgcccggcgtgacggaaggaaccacag<br><u>attccgggatccgtcgacc</u>        | SCO7449-7451                       |
| KF427 | gaagtgagctgacccggggcccgcacgcgcgtgccggggccgt<br><u>tgtaggctggagctgcttc</u>         | SCO7449-7451                       |
| KF446 | cggcaagatttctgacggggcgtgacctgcccgatatccactc<br><u>attccgggatccgtcgacc</u>         | SCO0934                            |
| KF447 | caccggatccggggcgaagtgcgctgccgtcctgcgccgtgctg<br><u>tgtaggctggagctgcttc</u>        | SCO0934                            |

### Primers for construction of plasmids for complementation of mutants <sup>1</sup>

|       |                                         |
|-------|-----------------------------------------|
| KF487 | ctgtagcattACTAGTactccaccctacctggtc      |
| KF488 | ctgtagcattGATATCgtcgtcttacctccttgggtgac |
| KF527 | gacttctgcgacgaactgct                    |
| KF528 | gtcgtcgtcatcgagaacct                    |

### Primers for construction of pKF210 and cloning of promoter fragments in this vector <sup>1</sup>

|       |                                     |          |
|-------|-------------------------------------|----------|
| KF455 | tagagtcgtaTCTAGAtggtcgtacggcagtcct  | SCO4157p |
| KF456 | tagagtcgta CATATGctcgtactcgcggttg   | SCO4157p |
| KF457 | tagagtcgtaTCTAGAgatgacacctggctggct  | SCO3857p |
| KF458 | tagagtcgta CATATGgctgtccttcgccgaacc | SCO3857p |
| KF459 | tagagtcgtaTCTAGAgccaactcggagtcgtaca | SCO0934p |
| KF460 | tagagtcgta CATATGatggtcctcctggtgag  | SCO0934p |
| KF461 | tagagtcgtaTCTAGAcgtggaccggaggacta   | SCO7449p |
| KF462 | tagagtcgta CATATGgccgtggtcaggagcat  | SCO7449p |

|        |                                                                    |          |
|--------|--------------------------------------------------------------------|----------|
| KF463  | tagagtcgtaTCTAGAgagagctgcacaacaactgc                               | SCO1774p |
| KF464  | tagagtcgta CATATGcaccgcctgatccgtcac                                | SCO1774p |
| KF465  | tagagtcgtaTCTAGActcccgcctctctcgaat                                 | SCO4421p |
| KF466  | tagagtcgta CATATGgtcgcagcttctgcctggt                               | SCO4421p |
| KF467a | tagagtcgtaTCTAGAAaatccgcagcacagtgc                                 | SCO1773p |
| KF468a | tagagtcgta CATATGcaccgggaactcgttgtt                                | SCO1773p |
| TL01   | ctgtagcattGAATTCacttGGATCCtcatTCTAGAAGGAGGtctCATATGgtgagcaagggcgag |          |
| TL02   | gttaacgcatGCGGCCGCgtcttactgtacagctcgtccatgc                        |          |
| TL03   | cagtgaataaGAATTCatccggccagtaatgacctcag                             |          |
| TL04   | gactttagaaGCGGCCGCtccccagatctaaagtttgtcg                           |          |

---

<sup>1</sup> Added restriction sites are in shown in capitals.
